# Supplementary material for: Low Water Intake and Risk for New-Onset Hyperglycemia
Source: PubMed Central journal article supplement — Diabetes Care. 2011 Nov 14;34(12):2551–4. doi: 10.2337/dc11-0652 (PMC3220834; doi:10.2337/dc11-0652), 2011-11-14

## SUPPLEMENTARY DATA

### Supplementary Methods

To estimate the number of grams of pure alcohol consumed per day, we used an alcohol conversion table: 125 ml of wine or 250 ml of beer/cider equals 10 g of alcohol, and one glass of spirits (20 ml) equals 7 g of alcohol. Participants were also asked to grade their tobacco consumption and their physical activity levels at home, at work and during their leisure time, combined in three classes.

Clinical measurements included body mass index (BMI= weight/height<sup>2</sup> in kg/m<sup>2</sup>), waist circumference, and systolic and diastolic blood pressures after 5 minutes resting in a supine position.

Biological measures included plasma glucose, serum insulin, triglycerides, and HDL-cholesterol concentrations in a morning blood sample after 12 hours of fasting. Blood analyses were performed in one of four laboratories: Institut inter-Régional pour la Santé (IRSA) at La Riche, or Health Examination Centre laboratories at Blois, Orléans, and Chartres, France. Triglycerides, HDL-cholesterol and gamma glutamyl transferase (gamma GT) were assayed with a DAX24 Technicon or with a Kone (Konelab, Evry, France). Plasma glucose was determined by the glucose-oxidase method using a Technicon RA 1000 (Bayer, Puteaux, France) or a Kone (Konelab, Evry, France), and serum insulin concentrations were centrally assessed at IRSA using a specific enzyme-immunoassay (MEIA) with an IMX (Abbott, Rungis, France). Urinary density in a spot urine sample was measured using dipsticks (Labtix 8SG and Multistix 8SG AMES/Bayer Diagnostics, Puteaux, France).

SUPPLEMENTARY DATA

**Supplementary Table 1. Odds ratios (95% confidence intervals) for the associations between classes of mean daily water intake at baseline and incident risk of impaired fasting glucose or type 2 diabetes, by categories of known diabetes risk factors at baseline.**

|                             | N    | Daily water intake |                  |                  | P for interaction | P             |
|-----------------------------|------|--------------------|------------------|------------------|-------------------|---------------|
|                             |      | < 0.5 L            | 0.5 to 1.0 L     | > 1.0 L          |                   |               |
| <b>Sex</b>                  |      |                    |                  |                  | 0.47              |               |
| Women                       | 1908 | 1.00               | 0.81 (0.55-1.18) | 0.83 (0.56-1.24) |                   | 0.54          |
| Men                         | 1707 | 1.00               | 0.61 (0.45-0.82) | 0.64 (0.47-0.89) |                   | <b>0.004</b>  |
| <b>Age categories</b>       |      |                    |                  |                  | 0.092             |               |
| 30-44 y                     | 1582 | 1.00               | 0.81 (0.56-1.18) | 0.76 (0.51-1.13) |                   | 0.39          |
| 45-54 y                     | 1039 | 1.00               | 0.60 (0.40-0.90) | 0.49 (0.32-0.77) |                   | <b>0.007</b>  |
| ≥ 55 y                      | 994  | 1.00               | 0.59 (0.39-0.91) | 0.91 (0.58-1.43) |                   | <b>0.018</b>  |
| <b>BMI categories</b>       |      |                    |                  |                  | 0.29              |               |
| < 25 kg/m <sup>2</sup>      | 2193 | 1.00               | 0.60 (0.43-0.84) | 0.53 (0.37-0.77) |                   | <b>0.0025</b> |
| 25 - 29.9 kg/m <sup>2</sup> | 1154 | 1.00               | 0.81 (0.55-1.18) | 0.76 (0.51-1.14) |                   | 0.41          |
| ≥ 30 kg/m <sup>2</sup>      | 268  | 1.00               | 0.45 (0.22-0.90) | 0.69 (0.34-1.40) |                   | 0.061         |
| <b>Waist categories</b>     |      |                    |                  |                  | 0.40              |               |
| Normal waist                | 2507 | 1.00               | 0.70 (0.51-0.95) | 0.62 (0.44-0.88) |                   | <b>0.022</b>  |
| Moderately obese            | 685  | 1.00               | 0.61 (0.39-0.96) | 0.52 (0.32-0.86) |                   | <b>0.031</b>  |
| Severely obese              | 414  | 1.00               | 0.63 (0.34-1.15) | 0.89 (0.49-1.64) |                   | 0.18          |
| <b>Physical activity</b>    |      |                    |                  |                  | 0.19              |               |
| Low                         | 874  | 1.00               | 0.82 (0.53-1.27) | 0.86 (0.53-1.41) |                   | 0.67          |
| Medium                      | 1960 | 1.00               | 0.73 (0.53-1.01) | 0.79 (0.56-1.11) |                   | 0.17          |
| High                        | 781  | 1.00               | 0.40 (0.23-0.68) | 0.40 (0.23-0.69) |                   | <b>0.002</b>  |

SUPPLEMENTARY DATA

|                                                       |      |      |                  |                  |  |              |      |  |
|-------------------------------------------------------|------|------|------------------|------------------|--|--------------|------|--|
| <b>Tobacco smoking</b>                                |      |      |                  |                  |  |              | 0.93 |  |
| Never smokers                                         | 1987 | 1.00 | 0.63 (0.45-0.89) | 0.67 (0.47-0.97) |  | <b>0.034</b> |      |  |
| Ex smokers                                            | 930  | 1.00 | 0.73 (0.47-1.13) | 0.76 (0.48-1.23) |  | 0.35         |      |  |
| Current smokers                                       | 698  | 1.00 | 0.83 (0.53-1.30) | 0.80 (0.49-1.31) |  | 0.63         |      |  |
| <b>Alcohol consumption</b>                            |      |      |                  |                  |  |              | 0.95 |  |
| Non drinkers                                          | 916  | 1.00 | 0.63 (0.36-1.12) | 0.71 (0.40-1.26) |  | 0.30         |      |  |
| 1 – 10 g/day                                          | 1014 | 1.00 | 0.82 (0.47-1.43) | 0.89 (0.50-1.58) |  | 0.79         |      |  |
| 10 – 20 g/day                                         | 282  | 1.00 | 0.74 (0.33-1.70) | 1.14 (0.48-2.75) |  | 0.48         |      |  |
| > 20 g/day                                            | 1403 | 1.00 | 0.67 (0.49-0.92) | 0.75 (0.53-1.06) |  | <b>0.044</b> |      |  |
| <b>Sex specific tertiles of fasting blood glucose</b> |      |      |                  |                  |  |              | 0.63 |  |
| T1                                                    | 1206 | 1.00 | 0.45 (0.22-0.90) | 0.48 (0.24-0.98) |  | 0.063        |      |  |
| T2                                                    | 1204 | 1.00 | 0.79 (0.49-1.27) | 0.87 (0.52-1.44) |  | 0.62         |      |  |
| T3                                                    | 1205 | 1.00 | 0.58 (0.42-0.80) | 0.71 (0.50-1.00) |  | <b>0.004</b> |      |  |
| <b>Sex specific tertiles of HOMA IR</b>               |      |      |                  |                  |  |              | 0.42 |  |
| T1                                                    | 1206 | 1.00 | 0.63 (0.38-1.02) | 0.46 (0.26-0.79) |  | 0.02         |      |  |
| T2                                                    | 1204 | 1.00 | 0.60 (0.40-0.90) | 0.68 (0.44-1.06) |  | 0.052        |      |  |
| T3                                                    | 1205 | 1.00 | 0.66 (0.46-0.95) | 0.81 (0.55-1.18) |  | 0.068        |      |  |
| <b>Sex specific tertiles of HOMA B</b>                |      |      |                  |                  |  |              | 0.43 |  |
| T1                                                    | 1206 | 1.00 | 0.80 (0.55-1.17) | 0.72 (0.48-1.09) |  | 0.29         |      |  |
| T2                                                    | 1204 | 1.00 | 0.59 (0.38-0.87) | 0.59 (0.38-0.91) |  | <b>0.024</b> |      |  |
| T3                                                    | 1205 | 1.00 | 0.67 (0.44-1.02) | 0.82 (0.52-1.27) |  | <b>0.003</b> |      |  |

SUPPLEMENTARY DATA

**Supplementary Figure 1.** Multivariate association between daily water intake at baseline and incident risk of impaired fasting glucose or type 2 diabetes. Model 1: Adjusted for age, sex, BMI, baseline fasting glycaemia, physical activity, smoking status, triglycerides, HOMA-IR. Model 2: Further adjusted on total cholesterol, self-reported mean daily volumes of beer-cider, sweet drinks, and wine consumed per day.

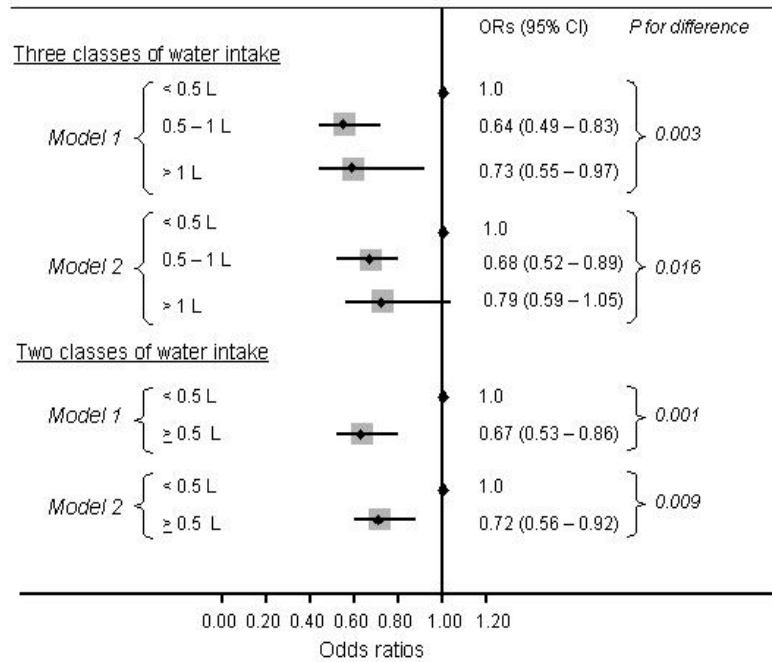

Supplement: supp_dc11-0652v110652_DC110652SupplementaryData.pdf [file supp_dc11-0652v110652_DC110652SupplementaryData.pdf]
